# Supplementary material for: Interchain interactions in poly(benzo[1,2-b:4,3-b′]dithiophene)s and the effect of substituents on aggregation
Source: Royal Society of Chemistry journal article supplement (doi:10.1039/b820002e), 2009-01-01

# Interchain Interactions in Poly(benzo[1,2-*b*:4,3-*b'*]dithiophene)s and the Effect of Substituents on Aggregation

Robert N. Brookins, Erik Berda<sup>a</sup> and John R. Reynolds

## SUPPLEMENTARY DATA

<sup>1</sup>H NMR of 2-bromo-7-boronic acid pinacol ester 4,5-dioctyloxybenzo[1,2-*b*:4,3-*b'*] dithiophene (4)

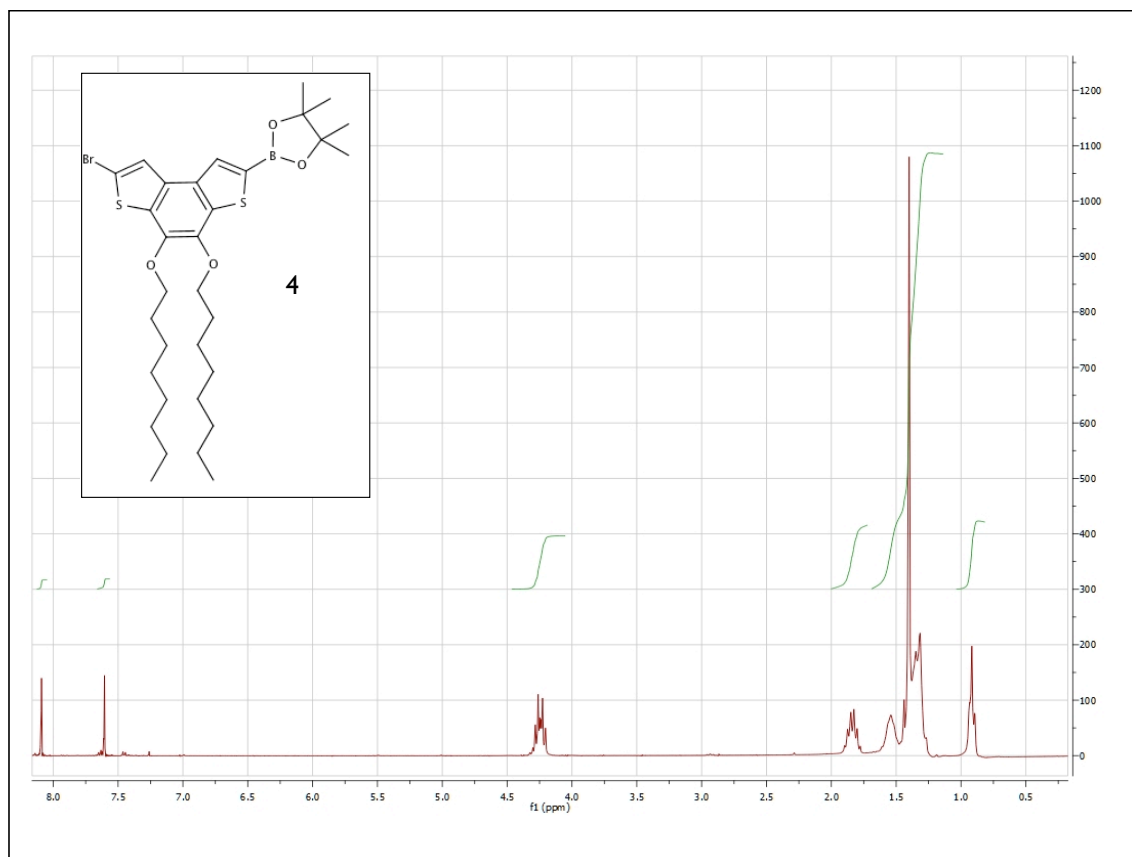

Supplement: b820002e.pdf [file b820002e.pdf]
